# Supplementary material for: The Longitudinal Association of Lifestyle with Cognitive Health and Dementia Risk: Findings from the HELIAD Study
Source: MDPI journal article supplement (doi:10.3390/nu14142818), 2022-07-08
Supplement: s1 [file s1]

## Supplementary Materials

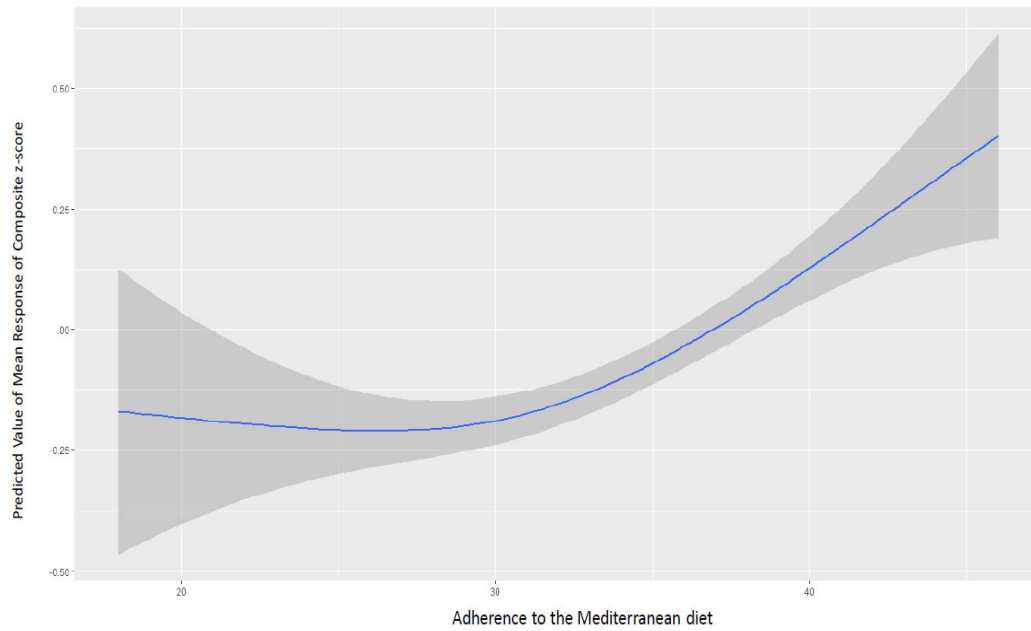

**Figure S1.** Best model fit exploring the association of adherence to the Mediterranean diet with baseline Global Cognition score. The model was adjusted for age, sex and years of education.

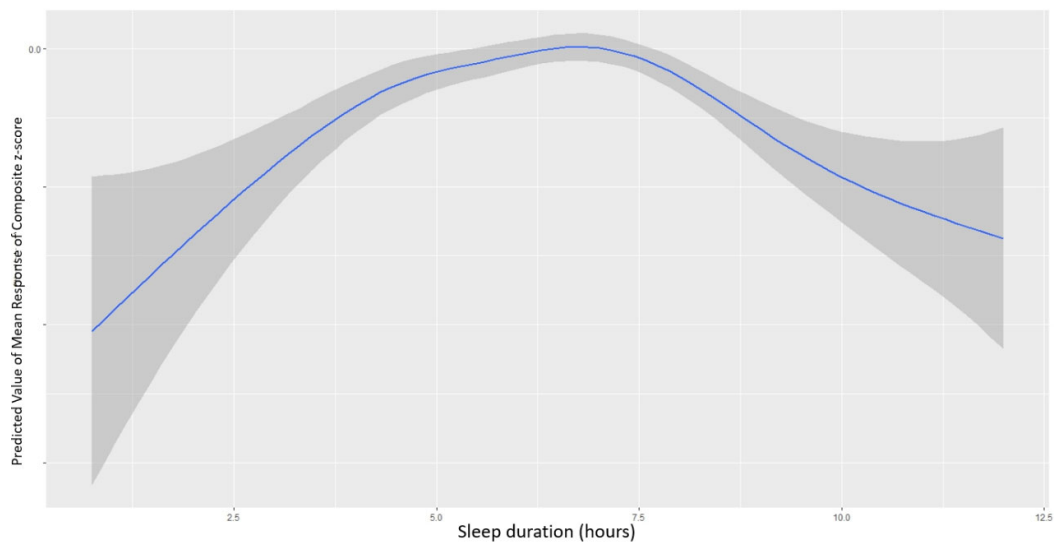

**Figure S2.** Best model fit exploring the association of sleep duration with baseline Global Cognition score. The model was adjusted for age, sex and years of education.

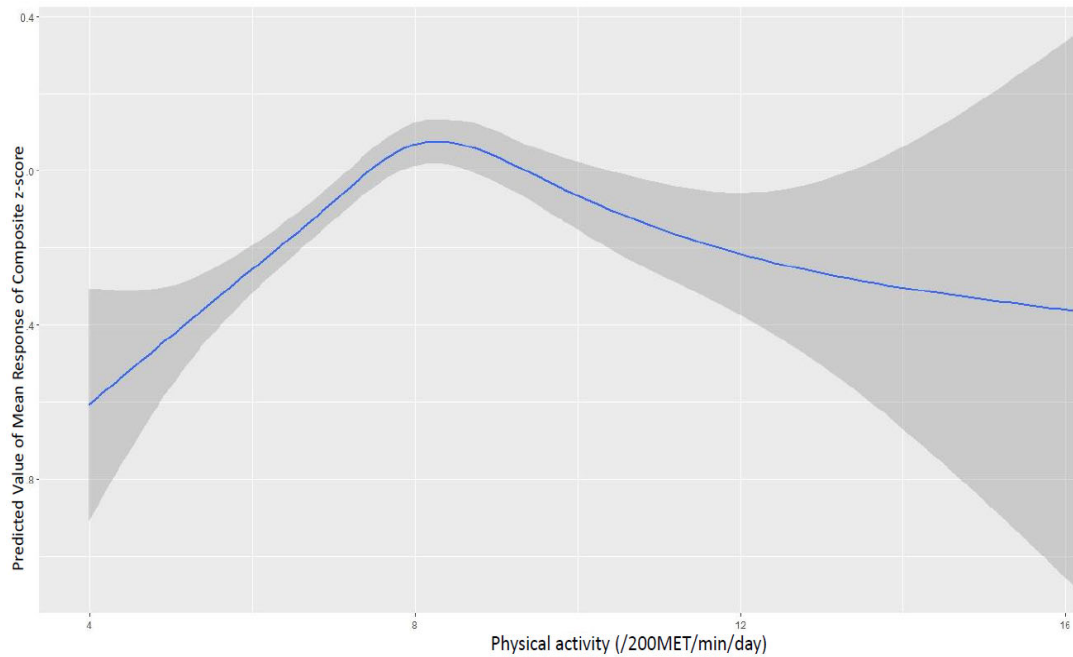

**Figure S3.** Best model fit exploring the association of physical activity with baseline Global Cognition score. The model was adjusted for age, sex and years of education.

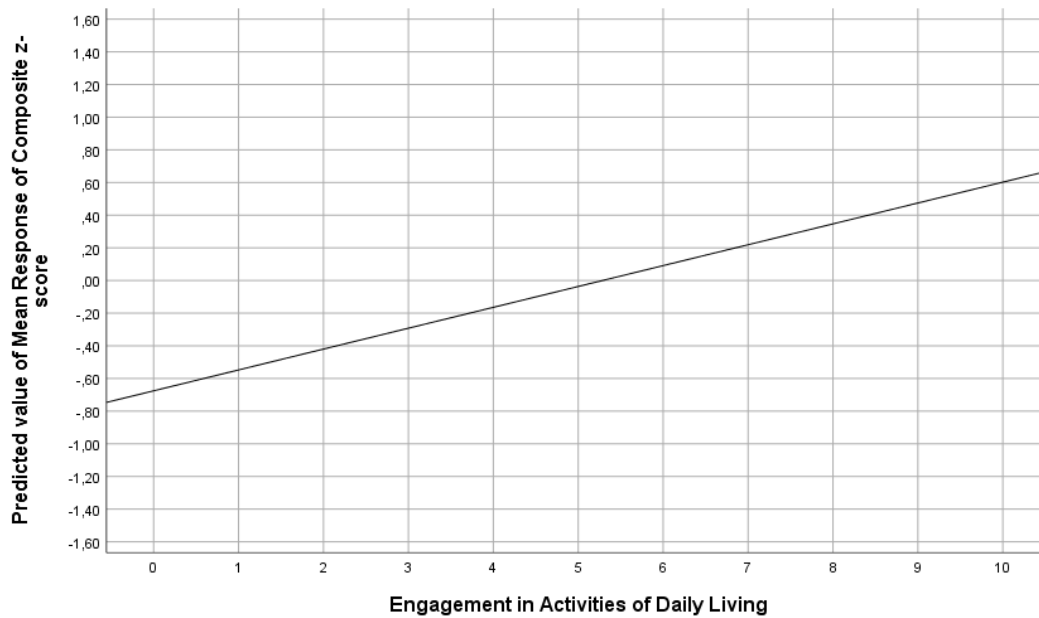

**Figure S4.** Best model fit exploring the association of engagement in activities of daily living with baseline Global Cognition score. The model was adjusted for age, sex and years of education.

**Table S1.** Results from Generalized Estimating Equations assessing the association between Total Lifestyle Index as a continuous variable and as quintiles (independent variables) with differential rates of Global Cognition score over time (dependent variables), in non-demented, non- mild cognitive impairment participants at baseline and at follow-up.

|                        | Total Lifestyle Index as a continuous variable |                  | Quartiles             | Total Lifestyle Index as quintiles   |              |                    |
|------------------------|------------------------------------------------|------------------|-----------------------|--------------------------------------|--------------|--------------------|
|                        | $\beta$<br>(95% CI)                            | <i>p</i>         |                       | $\beta$<br>(95% CI)                  | <i>p</i>     | <i>p</i> for trend |
| Global Cognition score | 0.004<br>(0.002-0.007)                         | <b>&lt;0.001</b> | 1 <sup>st</sup> (ref) |                                      |              |                    |
|                        |                                                |                  | 2 <sup>nd</sup>       | -0.013<br>(-0.053-0.028)             | 0.545        |                    |
|                        |                                                |                  | 3 <sup>rd</sup>       | -0.020<br>(-0.097-0.026)             | 0.391        | <b>&lt;0.001</b>   |
|                        |                                                |                  | 4 <sup>th</sup>       | 0.019<br>(-0.020- 0.058)             | 0.343        |                    |
|                        |                                                |                  | 5 <sup>th</sup>       | <b>0.041</b><br><b>(0.007-0.075)</b> | <b>0.018</b> |                    |

All models were adjusted for age, sex and years of education. Bold numbers indicate statistical significance ( $p < 0.05$ ). CI: Confidence Interval.
